# Supplementary material for: Regioselectivity in lithiation of 1-methylpyrazole: experimental, density functional theory and multinuclear NMR study
Source: Royal Society of Chemistry journal article supplement (doi:10.1039/b517607g), 2006-01-01
Supplement: b517607g.pdf [file b517607g.pdf]

Supplementary Material for Organic & Biomolecular Chemistry  
This journal is © The Royal Society of Chemistry 2005

**Supporting Information**

for

**Regioselectivity in Lithiation of 1-Methylpyrazole: Experimental,  
Density Functional Theory and Multinuclear NMR Study**

Thomas Balle\*, Mikael Begtrup, Jerzy W. Jaroszewski, Tommy Liljefors and  
Per-Ola Norrby

\*Corresponding author:  
Dr. Thomas Balle  
Department of Medicinal Chemistry  
The Danish University of Pharmaceutical Sciences  
Universitetsparken 2  
DK-2100 Copenhagen (Denmark)  
Fax: +45 3530 6040  
E-mail: [tb@dfuni.dk](mailto:tb@dfuni.dk)

Table 1. Absolute free energies and zero-point energies in solution (solution structures).

| Compd.           | Total free energy<br>in solution <sup>(a)</sup><br>hartree | Zero-point<br>energy <sup>(a)</sup><br>hartree | BSSE <sup>(b)</sup><br>hartree | # imag.<br>freq. |
|------------------|------------------------------------------------------------|------------------------------------------------|--------------------------------|------------------|
| <b>1</b>         | -265.539436                                                | 0.098762                                       |                                | 0                |
| <b>MeLi</b>      | -47.425200                                                 | 0.032588                                       |                                | 0                |
| <b>2</b>         | -312.983939                                                | 0.133472                                       |                                | 0                |
| <b>3-TS</b>      | -312.943751                                                | 0.128455                                       |                                | 1                |
| <b>4-TS</b>      | -312.934768                                                | 0.129135                                       |                                | 1                |
| <b>5-TS</b>      | -312.938150                                                | 0.128970                                       |                                | 1                |
| <b>α-TS</b>      | -312.950025                                                | 0.128827                                       |                                | 1                |
| <b>3-Li</b>      | -272.457296                                                | 0.086485                                       |                                | 0                |
| <b>4-Li</b>      | -272.459504                                                | 0.087372                                       |                                | 0                |
| <b>5-Li</b>      | -272.468058                                                | 0.087350                                       |                                | 0                |
| <b>α-Li</b>      | -272.467237                                                | 0.086987                                       |                                | 0                |
| <b>Methane</b>   | -40.525090                                                 | 0.044709                                       |                                | 0                |
| <b>α-Li·2THF</b> | -737.439005                                                | 0.322849                                       | 0.003716                       | 0                |
| <b>5-Li·3THF</b> | -969.923743                                                | 0.441772                                       | 0.005484                       | 0                |
| <b>THF</b>       | -232.474867                                                | 0.116471                                       |                                | 0                |

<sup>(a)</sup> IEFPCM/B3LYP/6-31+G(d,p), solvent=THF, Radii=UAKS

<sup>(b)</sup> Counterpoise BSSE, calculated for gas phase (solution phase structures)

#### Solution structures

IEFPCM/B3LYP/6-31+G(d,p) (Solvent=THF, Radii=UAKS)  
 Gaussian 03: SGI64-G03RevB.02

(1)

| Center<br>Number | Atomic<br>Number | Atomic Coordinates (Angstroms) |           |           |
|------------------|------------------|--------------------------------|-----------|-----------|
|                  |                  | X                              | Y         | Z         |
| 1                | 1                | -2.105005                      | 0.275152  | 0.079390  |
| 2                | 6                | -1.119729                      | -0.167701 | 0.041686  |
| 3                | 7                | 0.000289                       | 0.600258  | 0.000836  |
| 4                | 7                | 1.127755                       | -0.145143 | -0.042709 |
| 5                | 6                | 0.702176                       | -1.413925 | -0.028755 |
| 6                | 6                | -0.705827                      | -1.490511 | 0.024220  |
| 7                | 1                | 1.423085                       | -2.220589 | -0.057168 |
| 8                | 1                | -1.328875                      | -2.372638 | 0.046281  |
| 9                | 6                | 0.089058                       | 2.051702  | 0.000183  |
| 10               | 1                | 0.653496                       | 2.393572  | 0.871843  |
| 11               | 1                | -0.920215                      | 2.464478  | 0.038551  |
| 12               | 1                | 0.587140                       | 2.396839  | -0.909785 |

#### Methyl lithium

| Center<br>Number | Atomic<br>Number | Atomic Coordinates (Angstroms) |          |          |
|------------------|------------------|--------------------------------|----------|----------|
|                  |                  | X                              | Y        | Z        |
| 1                | 1                | -1.019238                      | 0.000000 | 0.827160 |
| 2                | 6                | 0.000000                       | 0.000000 | 0.401455 |

|   |   |          |           |           |
|---|---|----------|-----------|-----------|
| 3 | 1 | 0.509619 | 0.882686  | 0.827160  |
| 4 | 3 | 0.000000 | 0.000000  | -1.630071 |
| 5 | 1 | 0.509619 | -0.882686 | 0.827160  |

(2)

| Center Number | Atomic Number | Atomic Coordinates (Angstroms) |           |           |
|---------------|---------------|--------------------------------|-----------|-----------|
|               |               | X                              | Y         | Z         |
| 1             | 3             | -2.017214                      | 0.738002  | -0.038825 |
| 2             | 6             | 2.000595                       | -0.316774 | 0.061781  |
| 3             | 7             | 0.663920                       | -0.519139 | -0.001563 |
| 4             | 7             | -0.010212                      | 0.655672  | -0.075119 |
| 5             | 6             | 0.931227                       | 1.610634  | -0.047765 |
| 6             | 6             | 2.217679                       | 1.053543  | 0.040749  |
| 7             | 1             | 0.641721                       | 2.652606  | -0.082314 |
| 8             | 1             | 3.165367                       | 1.568218  | 0.089772  |
| 9             | 6             | -0.043984                      | -1.791067 | -0.099505 |
| 10            | 1             | -1.036954                      | -1.679087 | 0.340131  |
| 11            | 1             | 0.516666                       | -2.551011 | 0.447761  |
| 12            | 1             | -0.146750                      | -2.093636 | -1.146156 |
| 13            | 1             | 2.688793                       | -1.148213 | 0.119396  |
| 14            | 6             | -3.763414                      | -0.289235 | 0.117808  |
| 15            | 1             | -4.629584                      | 0.360642  | 0.340862  |
| 16            | 1             | -4.024664                      | -0.828298 | -0.811896 |
| 17            | 1             | -3.751533                      | -1.053571 | 0.917289  |

(3-TS)

| Center Number | Atomic Number | Atomic Coordinates (Angstroms) |           |           |
|---------------|---------------|--------------------------------|-----------|-----------|
|               |               | X                              | Y         | Z         |
| 1             | 1             | 1.587131                       | 2.432391  | -0.000457 |
| 2             | 6             | 1.124712                       | 1.454001  | -0.000283 |
| 3             | 7             | -0.226821                      | 1.328381  | 0.000058  |
| 4             | 7             | -0.574334                      | 0.010906  | -0.000151 |
| 5             | 6             | 0.562010                       | -0.729945 | -0.000380 |
| 6             | 6             | 1.662138                       | 0.175303  | -0.000601 |
| 7             | 1             | 0.625137                       | -3.979100 | 0.006003  |
| 8             | 1             | 2.715246                       | -0.071726 | -0.000942 |
| 9             | 6             | -1.236104                      | 2.371916  | 0.000872  |
| 10            | 1             | -1.868078                      | 2.291044  | -0.888950 |
| 11            | 1             | -0.738771                      | 3.343354  | -0.002343 |
| 12            | 1             | -1.863656                      | 2.294548  | 0.894064  |
| 13            | 3             | -1.500236                      | -1.669907 | -0.001076 |
| 14            | 1             | -0.880784                      | -3.864624 | -0.893615 |
| 15            | 1             | -0.890529                      | -3.863521 | 0.888173  |
| 16            | 6             | -0.354367                      | -3.482933 | -0.000095 |
| 17            | 1             | 0.215468                       | -2.142962 | -0.000178 |

(4-TS)

| Center Number | Atomic Number | Atomic Coordinates (Angstroms) |           |           |
|---------------|---------------|--------------------------------|-----------|-----------|
|               |               | X                              | Y         | Z         |
| 1             | 7             | -0.054883                      | -0.005433 | -0.162348 |
| 2             | 6             | -0.206482                      | -0.064428 | 1.168165  |
| 3             | 7             | 1.287684                       | -0.009592 | -0.343311 |
| 4             | 6             | 1.023673                       | -0.098670 | 1.887178  |
| 5             | 1             | 1.530606                       | 0.954704  | -2.193805 |
| 6             | 1             | -1.214634                      | -0.086081 | 1.568425  |

|    |   |          |           |           |
|----|---|----------|-----------|-----------|
| 7  | 6 | 1.951411 | -0.069180 | 0.844529  |
| 8  | 6 | 1.840683 | 0.036787  | -1.685817 |
| 9  | 1 | 1.499469 | -0.825080 | -2.266716 |
| 10 | 1 | 2.929839 | 0.014863  | -1.616456 |
| 11 | 1 | 3.034652 | -0.095563 | 0.854410  |
| 12 | 6 | 1.475857 | -1.101526 | 4.570216  |
| 13 | 1 | 1.239327 | -0.637351 | 3.147422  |
| 14 | 1 | 2.447151 | -0.918674 | 5.064559  |
| 15 | 1 | 0.689527 | -0.976514 | 5.336203  |
| 16 | 1 | 1.468809 | -2.164782 | 4.297309  |
| 17 | 3 | 1.299081 | 0.858843  | 3.769229  |

(5-Ts)

| Center Number | Atomic Number | Atomic Coordinates (Angstroms) |           |           |
|---------------|---------------|--------------------------------|-----------|-----------|
|               |               | X                              | Y         | Z         |
| 1             | 6             | -0.096719                      | 0.037455  | 0.105104  |
| 2             | 7             | 0.025343                       | 0.020232  | 1.469154  |
| 3             | 7             | 1.306470                       | -0.018535 | 1.911146  |
| 4             | 6             | 2.043322                       | -0.021917 | 0.792688  |
| 5             | 6             | 1.227331                       | 0.020583  | -0.356405 |
| 6             | 1             | 3.123781                       | -0.046785 | 0.865276  |
| 7             | 1             | 1.553677                       | 0.051440  | -1.388140 |
| 8             | 6             | -1.053951                      | 0.038165  | 2.443332  |
| 9             | 1             | -1.126413                      | -0.923237 | 2.962745  |
| 10            | 1             | -1.990788                      | 0.238840  | 1.921207  |
| 11            | 1             | -0.876114                      | 0.825517  | 3.180629  |
| 12            | 6             | -2.525084                      | 0.926513  | -1.210854 |
| 13            | 1             | -1.238862                      | 0.493555  | -0.477926 |
| 14            | 1             | -2.484499                      | 1.067623  | -2.305185 |
| 15            | 1             | -3.524829                      | 0.518748  | -0.972958 |
| 16            | 1             | -2.500995                      | 1.934007  | -0.774731 |
| 17            | 3             | -1.584049                      | -0.969410 | -1.140462 |

( $\alpha$ -Ts)

| Center Number | Atomic Number | Atomic Coordinates (Angstroms) |           |          |
|---------------|---------------|--------------------------------|-----------|----------|
|               |               | X                              | Y         | Z        |
| 1             | 1             | 0.156287                       | 0.311213  | 0.021550 |
| 2             | 6             | 0.134250                       | 0.196810  | 1.095704 |
| 3             | 7             | 1.221590                       | -0.243714 | 1.767324 |
| 4             | 7             | 0.962065                       | -0.321433 | 3.101821 |
| 5             | 6             | -0.317976                      | 0.059056  | 3.256815 |
| 6             | 6             | -0.885145                      | 0.407973  | 2.022651 |
| 7             | 1             | -0.762797                      | 0.073765  | 4.242800 |
| 8             | 1             | -1.887227                      | 0.760487  | 1.826869 |
| 9             | 6             | 2.567848                       | -0.593897 | 1.320627 |
| 10            | 1             | 2.767966                       | -0.067602 | 0.382806 |
| 11            | 1             | 2.615888                       | -1.676470 | 1.135897 |
| 12            | 6             | 4.524199                       | 0.535461  | 3.173301 |
| 13            | 1             | 4.974014                       | 0.019957  | 4.044840 |
| 14            | 1             | 4.271203                       | 1.558632  | 3.492493 |
| 15            | 1             | 5.331866                       | 0.616897  | 2.435126 |
| 16            | 1             | 3.563030                       | -0.062830 | 2.264536 |
| 17            | 3             | 2.797010                       | -0.560205 | 3.753647 |

(3-Li)

| Center | Atomic | Atomic Coordinates (Angstroms) |  |  |
|--------|--------|--------------------------------|--|--|
|--------|--------|--------------------------------|--|--|

| Number | Number | X         | Y         | Z         |
|--------|--------|-----------|-----------|-----------|
| 1      | 1      | -2.160508 | 0.686525  | 0.094983  |
| 2      | 6      | -1.235574 | 0.126118  | 0.052617  |
| 3      | 7      | -0.035576 | 0.758431  | -0.004014 |
| 4      | 7      | 0.999131  | -0.143156 | -0.049258 |
| 5      | 6      | 0.459058  | -1.393213 | -0.026105 |
| 6      | 6      | -0.968083 | -1.233295 | 0.039527  |
| 7      | 3      | 1.790937  | -2.911300 | -0.095671 |
| 8      | 1      | -1.711721 | -2.020833 | 0.070409  |
| 9      | 6      | 0.225350  | 2.183702  | 0.010396  |
| 10     | 1      | 0.749386  | 2.474624  | 0.927720  |
| 11     | 1      | -0.722519 | 2.723723  | -0.042940 |
| 12     | 1      | 0.843157  | 2.463060  | -0.848866 |

(4-Li)

| Center Number | Atomic Number | Atomic Coordinates (Angstroms) |           |           |
|---------------|---------------|--------------------------------|-----------|-----------|
|               |               | X                              | Y         | Z         |
| 1             | 1             | 2.025519                       | 0.195755  | 0.000000  |
| 2             | 6             | 0.998478                       | -0.153890 | 0.000000  |
| 3             | 7             | -0.008604                      | 0.775566  | 0.000000  |
| 4             | 7             | -1.221241                      | 0.176750  | 0.000000  |
| 5             | 6             | -0.928455                      | -1.137062 | 0.000000  |
| 6             | 6             | 0.468906                       | -1.448973 | 0.000000  |
| 7             | 1             | -1.764372                      | -1.831345 | 0.000000  |
| 8             | 3             | 1.391773                       | -3.234308 | 0.000000  |
| 9             | 6             | 0.093223                       | 2.221324  | 0.000000  |
| 10            | 1             | -0.385153                      | 2.643075  | -0.890187 |
| 11            | 1             | 1.149836                       | 2.497761  | 0.000000  |
| 12            | 1             | -0.385153                      | 2.643075  | 0.890187  |

(5-Li)

| Center Number | Atomic Number | Atomic Coordinates (Angstroms) |           |           |
|---------------|---------------|--------------------------------|-----------|-----------|
|               |               | X                              | Y         | Z         |
| 1             | 3             | -2.969214                      | -0.370469 | 0.035319  |
| 2             | 6             | -0.947678                      | -0.415768 | 0.015348  |
| 3             | 7             | -0.003295                      | 0.583725  | 0.009115  |
| 4             | 7             | 1.297364                       | 0.164859  | -0.010627 |
| 5             | 6             | 1.201201                       | -1.170065 | -0.016119 |
| 6             | 6             | -0.148550                      | -1.580360 | 0.000240  |
| 7             | 1             | 2.104720                       | -1.769497 | -0.027681 |
| 8             | 1             | -0.507853                      | -2.602937 | 0.004105  |
| 9             | 6             | -0.241854                      | 2.014879  | -0.006809 |
| 10            | 1             | 0.281901                       | 2.500906  | 0.823070  |
| 11            | 1             | -1.314108                      | 2.189825  | 0.095095  |
| 12            | 1             | 0.105784                       | 2.460915  | -0.945920 |

( $\alpha$ -Li)

| Center Number | Atomic Number | Atomic Coordinates (Angstroms) |           |          |
|---------------|---------------|--------------------------------|-----------|----------|
|               |               | X                              | Y         | Z        |
| 1             | 1             | 2.107761                       | -0.771387 | 0.000000 |
| 2             | 6             | 1.261812                       | -0.098857 | 0.000000 |
| 3             | 7             | -0.001127                      | -0.582637 | 0.000000 |
| 4             | 7             | -0.899498                      | 0.444115  | 0.000000 |
| 5             | 6             | -0.181291                      | 1.576864  | 0.000000 |

|    |   |           |           |           |
|----|---|-----------|-----------|-----------|
| 6  | 6 | 1.195091  | 1.292550  | 0.000000  |
| 7  | 1 | -0.680025 | 2.537279  | 0.000000  |
| 8  | 1 | 2.018968  | 1.991814  | 0.000000  |
| 9  | 6 | -0.558827 | -1.954126 | 0.000000  |
| 10 | 3 | -2.369533 | -0.915074 | 0.000000  |
| 11 | 1 | -0.167220 | -2.470710 | 0.886919  |
| 12 | 1 | -0.167220 | -2.470710 | -0.886919 |

-----  
**methane**  
 -----

| Center<br>Number | Atomic<br>Number | Atomic Coordinates (Angstroms) |           |           |
|------------------|------------------|--------------------------------|-----------|-----------|
|                  |                  | X                              | Y         | Z         |
| 1                | 1                | 0.630958                       | 0.630958  | 0.630958  |
| 2                | 6                | 0.000000                       | 0.000000  | 0.000000  |
| 3                | 1                | -0.630958                      | -0.630958 | 0.630958  |
| 4                | 1                | -0.630958                      | 0.630958  | -0.630958 |
| 5                | 1                | 0.630958                       | -0.630958 | -0.630958 |

-----  
**(5-Li·3thf)**  
 -----

| Center<br>Number | Atomic<br>Number | Coordinates (Angstroms) |           |           |
|------------------|------------------|-------------------------|-----------|-----------|
|                  |                  | X                       | Y         | Z         |
| 1                | 7                | -2.391336               | -1.809711 | 0.703310  |
| 2                | 7                | -3.026934               | -3.006565 | 0.487086  |
| 3                | 1                | -4.032621               | -0.683230 | 1.385156  |
| 4                | 6                | -2.242914               | -3.612116 | -0.413986 |
| 5                | 6                | -1.136695               | -2.802877 | -0.750180 |
| 6                | 6                | -1.231129               | -1.602281 | -0.007552 |
| 7                | 6                | -2.994173               | -0.901668 | 1.659315  |
| 8                | 1                | -2.988985               | -1.328524 | 2.669981  |
| 9                | 1                | -0.357509               | -3.053747 | -1.460989 |
| 10               | 1                | -2.514366               | -4.597872 | -0.777543 |
| 11               | 3                | 0.049186                | 0.086247  | -0.042303 |
| 12               | 8                | 0.801085                | 0.673554  | 1.738221  |
| 13               | 6                | 2.008579                | 1.469241  | 1.864210  |
| 14               | 6                | 2.620500                | 1.112300  | 3.227271  |
| 15               | 6                | 2.034086                | -0.281462 | 3.510757  |
| 16               | 6                | 0.635387                | -0.158961 | 2.911967  |
| 17               | 8                | -0.760854               | 1.736275  | -0.865344 |
| 18               | 6                | -1.861988               | 1.556215  | -1.791220 |
| 19               | 6                | -2.920139               | 2.565626  | -1.352702 |
| 20               | 6                | -2.054010               | 3.743685  | -0.875367 |
| 21               | 6                | -0.850529               | 3.039001  | -0.234570 |
| 22               | 8                | 1.727710                | -0.188529 | -1.125445 |
| 23               | 6                | 2.474038                | -1.423996 | -0.975009 |
| 24               | 6                | 2.975318                | -1.780539 | -2.376040 |
| 25               | 6                | 3.134634                | -0.395552 | -3.024775 |
| 26               | 6                | 1.941058                | 0.366197  | -2.446571 |
| 27               | 1                | -2.419921               | 0.025543  | 1.660916  |
| 28               | 1                | 1.740461                | 2.527968  | 1.782703  |
| 29               | 1                | 2.664809                | 1.206136  | 1.027732  |
| 30               | 1                | 3.713803                | 1.123696  | 3.202643  |
| 31               | 1                | 2.293042                | 1.823159  | 3.994017  |
| 32               | 1                | 2.013179                | -0.529356 | 4.575904  |

|    |   |           |           |           |
|----|---|-----------|-----------|-----------|
| 33 | 1 | 2.605328  | -1.057633 | 2.988862  |
| 34 | 1 | 0.193938  | -1.100926 | 2.579768  |
| 35 | 1 | -0.054676 | 0.337483  | 3.608521  |
| 36 | 1 | -2.171656 | 0.510844  | -1.722688 |
| 37 | 1 | -1.507330 | 1.766467  | -2.809974 |
| 38 | 1 | -3.513435 | 2.160216  | -0.525342 |
| 39 | 1 | -3.602521 | 2.835372  | -2.163829 |
| 40 | 1 | -1.734046 | 4.349620  | -1.730468 |
| 41 | 1 | -2.569314 | 4.401235  | -0.169554 |
| 42 | 1 | 0.093118  | 3.570503  | -0.396942 |
| 43 | 1 | -0.986386 | 2.883418  | 0.841727  |
| 44 | 1 | 1.804308  | -2.169737 | -0.539157 |
| 45 | 1 | 3.307906  | -1.241039 | -0.284325 |
| 46 | 1 | 2.224238  | -2.370233 | -2.913706 |
| 47 | 1 | 3.905380  | -2.355367 | -2.349809 |
| 48 | 1 | 4.076327  | 0.069004  | -2.710154 |
| 49 | 1 | 3.117235  | -0.425206 | -4.117936 |
| 50 | 1 | 2.109928  | 1.441212  | -2.339684 |
| 51 | 1 | 1.034422  | 0.208913  | -3.044447 |

( $\alpha$ -Li·2THF)

| Center<br>Number | Atomic<br>Number | Coordinates (Angstroms) |           |           |
|------------------|------------------|-------------------------|-----------|-----------|
|                  |                  | X                       | Y         | Z         |
| 1                | 3                | 0.053922                | 0.558265  | -0.294592 |
| 2                | 7                | -2.320822               | 1.129512  | 0.172520  |
| 3                | 1                | 0.476119                | -2.602502 | -4.273235 |
| 4                | 8                | 1.441127                | 0.399356  | 1.127648  |
| 5                | 6                | 1.358359                | -0.698124 | 2.075725  |
| 6                | 7                | -1.841109               | -0.136126 | 0.303718  |
| 7                | 6                | -2.873715               | -0.892061 | 0.702949  |
| 8                | 1                | 1.191040                | -1.026208 | -4.649630 |
| 9                | 1                | -1.361044               | 2.954573  | 0.501469  |
| 10               | 6                | -3.638215               | 1.169005  | 0.485803  |
| 11               | 6                | -1.367491               | 2.170524  | -0.271558 |
| 12               | 1                | 3.049934                | -0.364284 | 3.401705  |
| 13               | 6                | 2.147528                | -2.000109 | -2.956260 |
| 14               | 1                | 1.985742                | -2.902436 | -2.355308 |
| 15               | 1                | 3.067078                | -2.132409 | -3.533648 |
| 16               | 6                | 1.694308                | 1.335134  | 3.290202  |
| 17               | 1                | 2.365696                | 1.933275  | 3.912971  |
| 18               | 6                | 1.888985                | 1.604689  | 1.799071  |
| 19               | 1                | 2.946906                | 1.769655  | 1.553978  |
| 20               | 1                | 0.662538                | 1.555434  | 3.586079  |
| 21               | 6                | -0.034725               | -1.012125 | -2.851836 |
| 22               | 1                | -0.707772               | -1.720032 | -2.355820 |
| 23               | 1                | -0.633725               | -0.220873 | -3.312451 |
| 24               | 1                | -1.783043               | 2.620919  | -1.185883 |

|    |   |           |           |           |
|----|---|-----------|-----------|-----------|
| 25 | 1 | 1.895191  | -1.554965 | 1.656125  |
| 26 | 6 | 2.192771  | -0.764582 | -2.059899 |
| 27 | 1 | 2.697366  | 0.074097  | -2.559490 |
| 28 | 1 | 2.657982  | -0.925847 | -1.084662 |
| 29 | 1 | 0.301278  | -0.962176 | 2.193940  |
| 30 | 1 | 1.293601  | 2.434957  | 1.410866  |
| 31 | 1 | 1.524993  | -0.644813 | 4.260404  |
| 32 | 8 | 0.808420  | -0.413573 | -1.832196 |
| 33 | 6 | 1.970609  | -0.175198 | 3.378924  |
| 34 | 6 | 0.918890  | -1.704574 | -3.833193 |
| 35 | 1 | -2.736612 | -1.951776 | 0.876733  |
| 36 | 1 | -5.027179 | -0.441412 | 1.137372  |
| 37 | 6 | -4.041397 | -0.117115 | 0.834754  |
| 38 | 1 | -4.186156 | 2.099286  | 0.436897  |

(THF)

| Center<br>Number | Atomic<br>Number | Coordinates (Angstroms) |           |           |
|------------------|------------------|-------------------------|-----------|-----------|
|                  |                  | X                       | Y         | Z         |
| 1                | 1                | 1.221737                | 1.137651  | -1.092530 |
| 2                | 1                | -0.096203               | 2.135239  | -0.430286 |
| 3                | 1                | -1.733760               | -0.914532 | 0.300255  |
| 4                | 6                | 0.411022                | -0.948165 | 0.717673  |
| 5                | 1                | 1.289543                | -1.400556 | 0.242871  |
| 6                | 1                | -0.075952               | 0.945919  | 1.672637  |
| 7                | 1                | 0.204371                | -1.493436 | 1.643256  |
| 8                | 8                | -0.649708               | 0.239190  | -1.047284 |
| 9                | 6                | 0.633904                | 0.557609  | 0.932971  |
| 10               | 1                | 1.645212                | 0.803287  | 1.269947  |
| 11               | 6                | 0.324839                | 1.124507  | -0.457164 |
| 12               | 6                | -0.779792               | -0.952172 | -0.245477 |
| 13               | 1                | -0.797117               | -1.817771 | -0.915892 |
